# Supplementary material for: Characterization of Soil Microbial Biomass Carbon and Nitrogen in Four Forest Types of Shushan Urban Forest Park
Source: MDPI journal article supplement (doi:10.3390/f14071498), 2023-07-21
Supplement: s1 [file s1]

**Table S1.** Soil physicochemical properties in four urban forest types in the dormant season

| Soil layer (cm) | Forest type | pH                | EC ( $\mu\text{S}/\text{cm}$ ) | SWC (%)           | SOC (g/kg)         | TN(g/kg)         | TP(mg/g)          |
|-----------------|-------------|-------------------|--------------------------------|-------------------|--------------------|------------------|-------------------|
| 0-10            | PM          | 5.37 $\pm$ 0.58ab | 77.17 $\pm$ 45.18a             | 24.64 $\pm$ 6.10b | 17.87 $\pm$ 9.86c  | 1.14 $\pm$ 0.52c | 0.12 $\pm$ 0.05b  |
|                 | QA          | 4.61 $\pm$ 0.19c  | 50.46 $\pm$ 15.88b             | 27.05 $\pm$ 3.27b | 22.88 $\pm$ 8.84b  | 1.58 $\pm$ 0.45b | 0.19 $\pm$ 0.05a  |
|                 | LF          | 4.98 $\pm$ 0.48b  | 52.67 $\pm$ 6.54b              | 30.28 $\pm$ 4.95a | 24.85 $\pm$ 10.31a | 1.91 $\pm$ 0.61a | 0.22 $\pm$ 0.05a  |
|                 | DB          | 5.85 $\pm$ 0.48a  | 61.85 $\pm$ 23.41a             | 29.58 $\pm$ 3.16a | 21.94 $\pm$ 5.59b  | 1.86 $\pm$ 0.36a | 0.18 $\pm$ 0.03a  |
| 10-20           | PM          | 5.54 $\pm$ 0.76a  | 59.35 $\pm$ 37.48a             | 30.01 $\pm$ 4.54a | 11.80 $\pm$ 4.07c  | 0.87 $\pm$ 0.22c | 0.12 $\pm$ 0.10c  |
|                 | QA          | 4.85 $\pm$ 0.36b  | 49.26 $\pm$ 6.61b              | 25.60 $\pm$ 8.95b | 16.59 $\pm$ 3.54b  | 1.27 $\pm$ 0.28b | 0.19 $\pm$ 0.03ab |
|                 | LF          | 5.19 $\pm$ 0.55a  | 52.53 $\pm$ 15.06ab            | 28.89 $\pm$ 4.37a | 18.51 $\pm$ 5.24a  | 1.58 $\pm$ 0.32a | 0.20 $\pm$ 0.06a  |
|                 | DB          | 5.86 $\pm$ 0.52a  | 57.69 $\pm$ 15.18a             | 30.14 $\pm$ 4.37a | 16.30 $\pm$ 2.97b  | 1.54 $\pm$ 0.19a | 0.15 $\pm$ 0.03b  |
| 20-30           | PM          | 5.76 $\pm$ 0.39ab | 60.41 $\pm$ 21.07a             | 32.48 $\pm$ 4.22a | 10.52 $\pm$ 3.63c  | 0.81 $\pm$ 0.22c | 0.09 $\pm$ 0.02b  |
|                 | QA          | 5.18 $\pm$ 0.48c  | 54.61 $\pm$ 20.12b             | 26.32 $\pm$ 5.38b | 13.93 $\pm$ 3.91b  | 1.15 $\pm$ 0.26b | 0.17 $\pm$ 0.05a  |
|                 | LF          | 5.46 $\pm$ 0.53b  | 51.45 $\pm$ 9.06b              | 29.77 $\pm$ 5.66a | 15.84 $\pm$ 4.83a  | 1.44 $\pm$ 0.27a | 0.18 $\pm$ 0.04a  |
|                 | DB          | 6.02 $\pm$ 0.47a  | 55.79 $\pm$ 13.64ab            | 30.94 $\pm$ 4.24a | 14.18 $\pm$ 4.01b  | 1.56 $\pm$ 0.21a | 0.14 $\pm$ 0.04a  |

**Note.** PM, *Pinus massoniana*; QA, *Quercus acutissima*; LF, *Liquidambar formosana*; DB, secondary deciduous broadleaved forest. EC, Electrical conductivity; SWC, Soil water content; SOC, Soil organic carbon; TN, Total nitrogen; TP, Total P. The use of different letters to denote different groups indicates significant differences between their means at a significance level of  $P<0.05$ .

**Table S2.** Soil microbial biomass C, N in growing season and dormant season

| Soil Layer(cm) | Forest type | Growing season        |                     | Dormant season        |                      |
|----------------|-------------|-----------------------|---------------------|-----------------------|----------------------|
|                |             | MBC(mg/kg)            | MBN(mg/kg)          | MBC(mg/kg)            | MBN(mg/kg)           |
| 0-10           | PM          | 38.404 $\pm$ 14.179b  | 12.518 $\pm$ 5.436b | 26.888 $\pm$ 15.006ab | 8.366 $\pm$ 4.506bc  |
|                | QA          | 13.329 $\pm$ 7.024a   | 8.642 $\pm$ 3.248a  | 22.134 $\pm$ 11.480b  | 4.880 $\pm$ 2.062c   |
|                | LF          | 26.048 $\pm$ 12.906a  | 6.470 $\pm$ 3.080a  | 36.834 $\pm$ 12.417a  | 13.949 $\pm$ 6.224a  |
|                | DB          | 26.459 $\pm$ 17.326a  | 6.758 $\pm$ 2.399a  | 33.997 $\pm$ 17.631ab | 13.317 $\pm$ 7.169ab |
| 10-20          | PM          | 30.765 $\pm$ 15.660c  | 7.959 $\pm$ 4.184ab | 23.540 $\pm$ 11.917ab | 5.642 $\pm$ 2.629a   |
|                | QA          | 6.145 $\pm$ 3.318b    | 7.024 $\pm$ 1.734b  | 27.057 $\pm$ 11.370ab | 6.106 $\pm$ 2.117a   |
|                | LF          | 7.907 $\pm$ 3.210ab   | 8.641 $\pm$ 2.135ab | 34.444 $\pm$ 13.639b  | 10.973 $\pm$ 2.825b  |
|                | DB          | 17.046 $\pm$ 10.519a  | 10.042 $\pm$ 1.849a | 21.908 $\pm$ 12.796a  | 8.190 $\pm$ 2.849a   |
| 20-30          | PM          | 19.119 $\pm$ 13.989b  | 6.545 $\pm$ 4.642b  | 20.536 $\pm$ 10.330ab | 5.254 $\pm$ 2.400a   |
|                | QA          | 5.334 $\pm$ 2.906a    | 3.452 $\pm$ 1.079a  | 27.217 $\pm$ 13.872ab | 6.238 $\pm$ 1.829a   |
|                | LF          | 5.533 $\pm$ 3.069a    | 4.232 $\pm$ 1.859ab | 32.077 $\pm$ 12.654b  | 9.051 $\pm$ 2.105b   |
|                | DB          | 14.068 $\pm$ 10.536ab | 3.807 $\pm$ 1.762a  | 19.660 $\pm$ 10.553a  | 6.464 $\pm$ 2.031a   |

**Note.** Values with different lowercase letters (a, b, c) in the same row indicate significant differences ( $P<0.05$ ) based on a One way ANOVA followed by Fisher's LSD test.

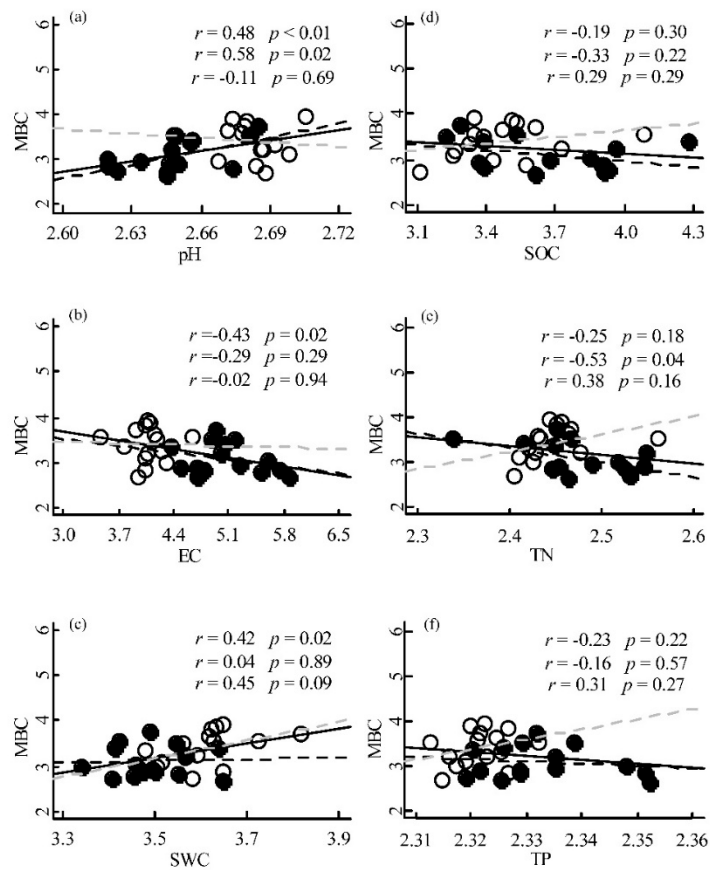

**Figure S1.** Linear relationships between soil physicochemical properties and soil MBC in *Quercus acutissima* plantation. **(a)** pH; **(b)** EC; **(c)** SWC; **(d)** SOC; **(e)** TN; and **(f)** TP. The solid line represents the regression line of all the data points from all seasons. The dashed line represents the regression line of the data points from the growing season. The gray dashed line represents the regression line of the data points from the dormant season. The open circles represent the data points from the growing season. The solid circles represent the data points from the dormant season.

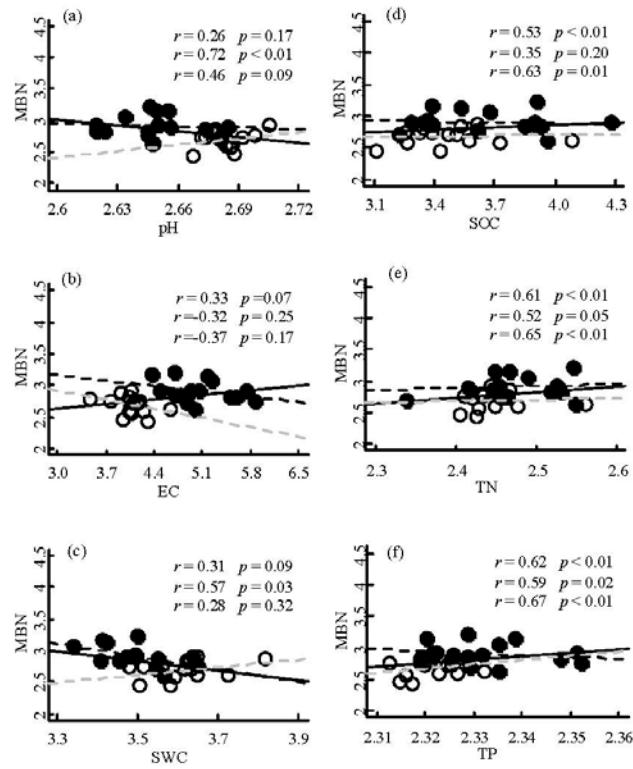

**Figure S2.** Linear relationships between soil physicochemical properties and soil MBN in *Quercus acutissima* plantation. (a) pH; (b) EC; (c) SWC; (d) SOC; (e) TN; and (f) TP.

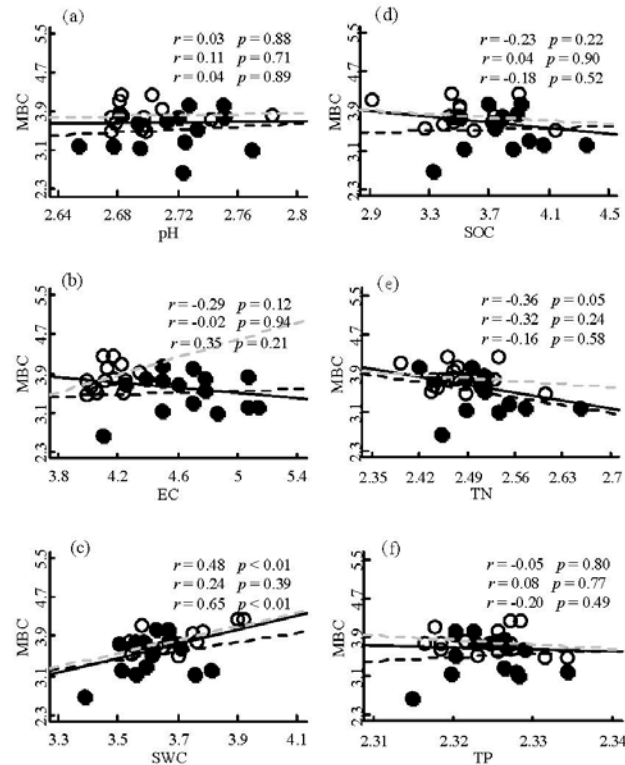

**Figure S3.** Linear relationships between soil physicochemical properties and soil MBC in *Liquidambar formosana* plantation. (a) pH; (b) EC; (c) SWC; (d) SOC; (e) TN; and (f) TP.

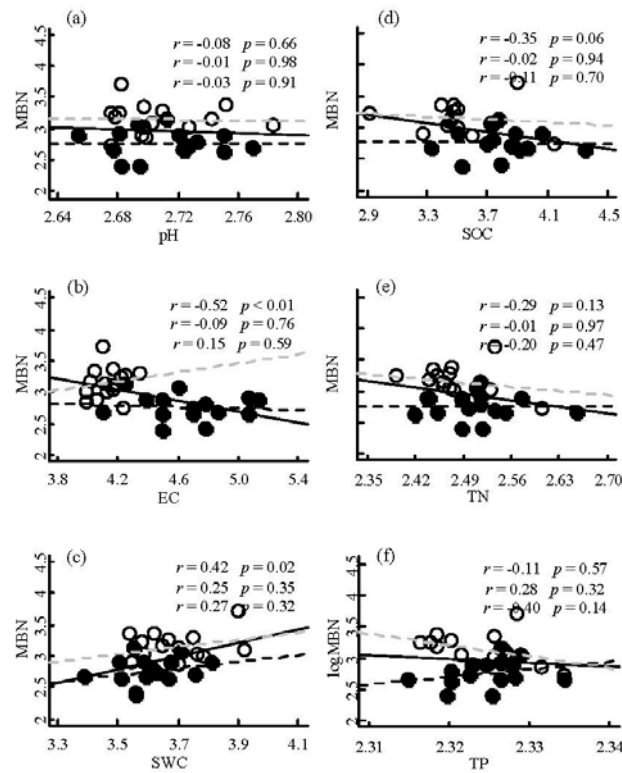

**Figure S4.** Linear relationships between soil physicochemical properties and soil MBN in *Liquidambar formosana* plantation. (a) pH; (b) EC; (c) SWC; (d) SOC; (e) TN; and (f) TP.

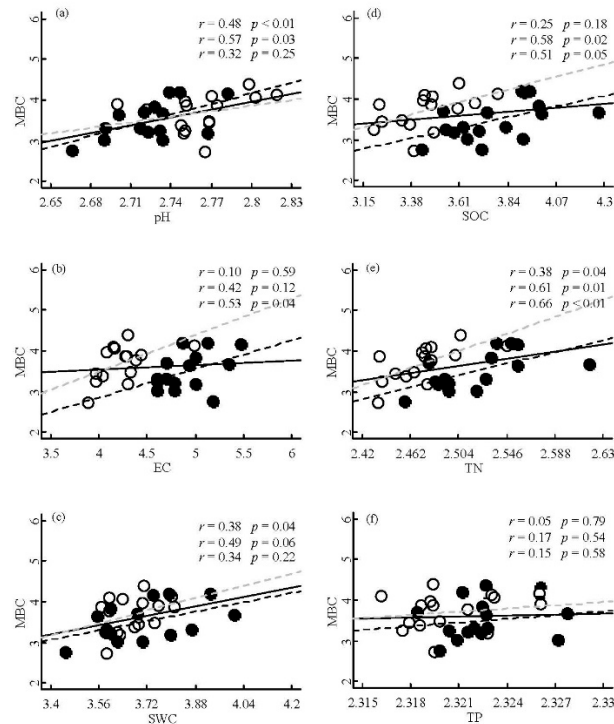

**Figure S5.** Linear relationships between soil physicochemical properties and soil MBC in secondary deciduous broadleaved forest. (a) pH; (b) EC; (c) SWC; (d) SOC; (e) TN; and (f) TP.

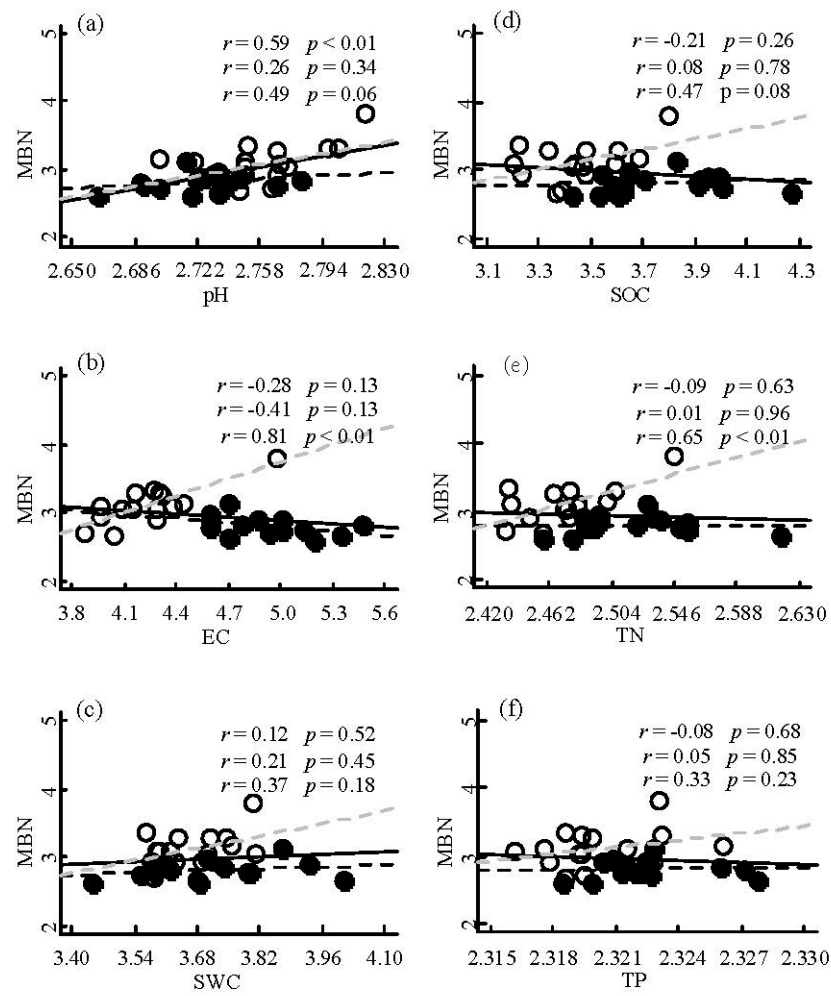

**Figure S6.** Linear relationships between soil physicochemical properties and soil MBN in secondary deciduous broadleaved forest. (a) pH; (b) EC; (c) SWC; (d) SOC; (e) TN; and (f) TP.
